# Supplementary material for: Integrated approaches for pathogen monitoring and shotgun metagenomic analysis in Atlantic salmon farming
Source: Research Square preprint supplement (doi:10.21203/rs.3.rs-8373998/v1), 2026-02-19
Supplement: Supplementary file 2 [file 672a8d3e917ac0b0b4e2934f.xlsx]

## Sheet: TopN_Genus_per_sample
Group	Sample	Sample_display	Name	Percent (%)	Relative abundance (%)
Hatchery	Sample_01	Outlet water (Feb/23)	Other	27.25	55.1843
Hatchery	Sample_01	Outlet water (Feb/23)	Mycolicibacterium	9.19	18.6108
Hatchery	Sample_01	Outlet water (Feb/23)	Mycobacterium	6.88	13.9328
Hatchery	Sample_01	Outlet water (Feb/23)	Flavobacterium	4.62	9.35601
Hatchery	Sample_01	Outlet water (Feb/23)	Streptomyces	1.44	2.91616
Hatchery	Sample_02	Tank water (Feb/23)	Other	27.07	53.3189
Hatchery	Sample_02	Tank water (Feb/23)	Mycolicibacterium	10	19.6967
Hatchery	Sample_02	Tank water (Feb/23)	Mycobacterium	7.39	14.5558
Hatchery	Sample_02	Tank water (Feb/23)	Flavobacterium	4.53	8.92259
Hatchery	Sample_02	Tank water (Feb/23)	Devosia	1.78	3.50601
Hatchery	Sample_03	Inlet water (Feb/23)	Other	29.61	60.8258
Hatchery	Sample_03	Inlet water (Feb/23)	Mycolicibacterium	7.25	14.8932
Hatchery	Sample_03	Inlet water (Feb/23)	Mycobacterium	5.53	11.3599
Hatchery	Sample_03	Inlet water (Feb/23)	Flavobacterium	4.66	9.57272
Hatchery	Sample_03	Inlet water (Feb/23)	Devosia	1.63	3.3484
Hatchery	Sample_05	Outlet water (May/23)	Other	17.57	39.6972
Hatchery	Sample_05	Outlet water (May/23)	Flavobacterium	11.31	25.5535
Hatchery	Sample_05	Outlet water (May/23)	Mycolicibacterium	6.13	13.85
Hatchery	Sample_05	Outlet water (May/23)	Aurantimicrobium	4.85	10.958
Hatchery	Sample_05	Outlet water (May/23)	Mycobacterium	4.4	9.94126
Hatchery	Sample_06	Tank water (May/23)	Other	15.02	34.0976
Hatchery	Sample_06	Tank water (May/23)	Flavobacterium	8.84	20.0681
Hatchery	Sample_06	Tank water (May/23)	Mycolicibacterium	8.79	19.9546
Hatchery	Sample_06	Tank water (May/23)	Mycobacterium	6.14	13.9387
Hatchery	Sample_06	Tank water (May/23)	Aurantimicrobium	5.26	11.941
Hatchery	Sample_07	Inlet water (May/23)	Other	15.95	34.9245
Hatchery	Sample_07	Inlet water (May/23)	Mycolicibacterium	8.85	19.3781
Hatchery	Sample_07	Inlet water (May/23)	Flavobacterium	8.6	18.8307
Hatchery	Sample_07	Inlet water (May/23)	Mycobacterium	6.38	13.9698
Hatchery	Sample_07	Inlet water (May/23)	Aurantimicrobium	5.89	12.8969
Seawater sites	Sample_09	1km from cage - 1m depth (Apr/23)	Other	16.26	64.7551
Seawater sites	Sample_09	1km from cage - 1m depth (Apr/23)	Polaribacter	3.15	12.5448
Seawater sites	Sample_09	1km from cage - 1m depth (Apr/23)	"Candidatus Pelagibacter"	2.85	11.3501
Seawater sites	Sample_09	1km from cage - 1m depth (Apr/23)	"Candidatus Pseudothioglobus"	1.47	5.85424
Seawater sites	Sample_09	1km from cage - 1m depth (Apr/23)	Flavobacterium	1.38	5.49582
Seawater sites	Sample_10	1km from cage - 20m depth (Apr/23)	Other	14.9	67.8815
Seawater sites	Sample_10	1km from cage - 20m depth (Apr/23)	Polaribacter	2.41	10.9795
Seawater sites	Sample_10	1km from cage - 20m depth (Apr/23)	"Candidatus Pelagibacter"	2.31	10.5239
Seawater sites	Sample_10	1km from cage - 20m depth (Apr/23)	"Candidatus Pseudothioglobus"	1.17	5.3303
Seawater sites	Sample_10	1km from cage - 20m depth (Apr/23)	Flavobacterium	1.16	5.28474
Seawater sites	Sample_11	Seawater cage (Apr/23)	Other	16.37	65.0377
Seawater sites	Sample_11	Seawater cage (Apr/23)	"Candidatus Pelagibacter"	3.55	14.1041
Seawater sites	Sample_11	Seawater cage (Apr/23)	Polaribacter	2.25	8.93921
Seawater sites	Sample_11	Seawater cage (Apr/23)	"Candidatus Pseudothioglobus"	1.84	7.31029
Seawater sites	Sample_11	Seawater cage (Apr/23)	Flavobacterium	1.16	4.60866
Seawater sites	Sample_13	1km from cage - 1m depth (May/23)	Other	14.31	65.7931
Seawater sites	Sample_13	1km from cage - 1m depth (May/23)	"Candidatus Pelagibacter"	3.5	16.092
Seawater sites	Sample_13	1km from cage - 1m depth (May/23)	"Candidatus Pseudothioglobus"	1.77	8.13793
Seawater sites	Sample_13	1km from cage - 1m depth (May/23)	Flavobacterium	1.16	5.33333
Seawater sites	Sample_13	1km from cage - 1m depth (May/23)	Planktomarina	1.01	4.64368
Seawater sites	Sample_14	1km from cage - 20m depth (May/23)	Other	16.9	66.7193
Seawater sites	Sample_14	1km from cage - 20m depth (May/23)	"Candidatus Pelagibacter"	4.55	17.9629
Seawater sites	Sample_14	1km from cage - 20m depth (May/23)	"Candidatus Pseudothioglobus"	1.88	7.42203
Seawater sites	Sample_14	1km from cage - 20m depth (May/23)	Flavobacterium	1.03	4.06632
Seawater sites	Sample_14	1km from cage - 20m depth (May/23)	Streptomyces	0.97	3.82945
Seawater sites	Sample_15	Seawater cage (May/23)	Other	20.06	68.5109
Seawater sites	Sample_15	Seawater cage (May/23)	"Candidatus Pelagibacter"	4.57	15.6079
Seawater sites	Sample_15	Seawater cage (May/23)	"Candidatus Pseudothioglobus"	2.37	8.09426
Seawater sites	Sample_15	Seawater cage (May/23)	Flavobacterium	1.43	4.88388
Seawater sites	Sample_15	Seawater cage (May/23)	Vibrio	0.85	2.90301
Seawater sites	Sample_17	Seawater cage (Jun/23)	Other	13.08	50.3464
Seawater sites	Sample_17	Seawater cage (Jun/23)	"Candidatus Pelagibacter"	6.23	23.98
Seawater sites	Sample_17	Seawater cage (Jun/23)	Prasinovirus	3.88	14.9346
Seawater sites	Sample_17	Seawater cage (Jun/23)	"Candidatus Pseudothioglobus"	1.99	7.65974
Seawater sites	Sample_17	Seawater cage (Jun/23)	Flavobacterium	0.8	3.07929
Seawater sites	Sample_21	Seawater cage (Jul/23)	Other	16.92	63.7769
Seawater sites	Sample_21	Seawater cage (Jul/23)	"Candidatus Pelagibacter"	5.44	20.5051
Seawater sites	Sample_21	Seawater cage (Jul/23)	"Candidatus Pseudothioglobus"	2.36	8.89559
Seawater sites	Sample_21	Seawater cage (Jul/23)	Prasinovirus	0.98	3.69393
Seawater sites	Sample_21	Seawater cage (Jul/23)	Flavobacterium	0.83	3.12853
Seawater sites	Sample_18	Seawater cage (Aug/23)	Other	14.43	61.2739
Seawater sites	Sample_18	Seawater cage (Aug/23)	"Candidatus Pelagibacter"	6.01	25.5202
Seawater sites	Sample_18	Seawater cage (Aug/23)	"Candidatus Pseudothioglobus"	1.66	7.04883
Seawater sites	Sample_18	Seawater cage (Aug/23)	Flavobacterium	0.84	3.56688
Seawater sites	Sample_18	Seawater cage (Aug/23)	Vibrio	0.61	2.59023
Seawater sites	Sample_20	Seawater cage (Sep/23)	Other	8.74	71.1147
Seawater sites	Sample_20	Seawater cage (Sep/23)	"Candidatus Pelagibacter"	2.01	16.3548
Seawater sites	Sample_20	Seawater cage (Sep/23)	Vibrio	0.65	5.28885
Seawater sites	Sample_20	Seawater cage (Sep/23)	Flavobacterium	0.48	3.90561
Seawater sites	Sample_20	Seawater cage (Sep/23)	Aliivibrio	0.41	3.33605
Seawater sites	Sample_22	1km from cage - 1m depth (Oct/23)	Other	16.92	66.7192
Seawater sites	Sample_22	1km from cage - 1m depth (Oct/23)	"Candidatus Pelagibacter"	6.12	24.1325
Seawater sites	Sample_22	1km from cage - 1m depth (Oct/23)	Flavobacterium	0.88	3.47003
Seawater sites	Sample_22	1km from cage - 1m depth (Oct/23)	Prasinovirus	0.79	3.11514
Seawater sites	Sample_22	1km from cage - 1m depth (Oct/23)	"Candidatus Pseudothioglobus"	0.65	2.56309
Seawater sites	Sample_23	1km from cage - 20m depth (Oct/23)	Other	18.31	67.6395
Seawater sites	Sample_23	1km from cage - 20m depth (Oct/23)	"Candidatus Pelagibacter"	6.15	22.7189
Seawater sites	Sample_23	1km from cage - 20m depth (Oct/23)	Flavobacterium	0.99	3.65719
Seawater sites	Sample_23	1km from cage - 20m depth (Oct/23)	Prasinovirus	0.88	3.25083
Seawater sites	Sample_23	1km from cage - 20m depth (Oct/23)	"Candidatus Pseudothioglobus"	0.74	2.73365
Seawater sites	Sample_24	Seawater cage (Oct/23)	Other	26.25	63.4364
Seawater sites	Sample_24	Seawater cage (Oct/23)	Vibrio	5.24	12.6631
Seawater sites	Sample_24	Seawater cage (Oct/23)	Colwellia	3.8	9.18318
Seawater sites	Sample_24	Seawater cage (Oct/23)	"Candidatus Pelagibacter"	3.55	8.57902
Seawater sites	Sample_24	Seawater cage (Oct/23)	Pseudoalteromonas	2.54	6.13823
Seawater sites	Sample_28	Seawater cage (Dec/23)	Other	15.44	71.4815
Seawater sites	Sample_28	Seawater cage (Dec/23)	"Candidatus Pelagibacter"	2.91	13.4722
Seawater sites	Sample_28	Seawater cage (Dec/23)	Colwellia	1.38	6.38889
Seawater sites	Sample_28	Seawater cage (Dec/23)	Kordia	0.95	4.39815
Seawater sites	Sample_28	Seawater cage (Dec/23)	Tenacibaculum	0.92	4.25926
Seawater sites	Sample_30	1km from cage - 1m depth (Feb/24)	Other	14.34	64.9163
Seawater sites	Sample_30	1km from cage - 1m depth (Feb/24)	"Candidatus Pelagibacter"	5.28	23.9022
Seawater sites	Sample_30	1km from cage - 1m depth (Feb/24)	"Candidatus Pseudothioglobus"	1.22	5.52286
Seawater sites	Sample_30	1km from cage - 1m depth (Feb/24)	Polaribacter	0.68	3.07832
Seawater sites	Sample_30	1km from cage - 1m depth (Feb/24)	Flavobacterium	0.57	2.58035
Seawater sites	Sample_31	1km from cage - 20m depth (Feb/24)	Other	14.31	64.7218
Seawater sites	Sample_31	1km from cage - 20m depth (Feb/24)	"Candidatus Pelagibacter"	5.14	23.2474
Seawater sites	Sample_31	1km from cage - 20m depth (Feb/24)	"Candidatus Pseudothioglobus"	1.32	5.97015
Seawater sites	Sample_31	1km from cage - 20m depth (Feb/24)	Flavobacterium	0.68	3.07553
Seawater sites	Sample_31	1km from cage - 20m depth (Feb/24)	Polaribacter	0.66	2.98507
Seawater sites	Sample_32	Seawater cage (Feb/24)	Other	15.08	63.2285
Seawater sites	Sample_32	Seawater cage (Feb/24)	"Candidatus Pelagibacter"	6.06	25.4088
Seawater sites	Sample_32	Seawater cage (Feb/24)	"Candidatus Pseudothioglobus"	1.42	5.95388
Seawater sites	Sample_32	Seawater cage (Feb/24)	Polaribacter	0.65	2.72537
Seawater sites	Sample_32	Seawater cage (Feb/24)	Flavobacterium	0.64	2.68344
Seawater sites	Sample_34	200m from cage - 1m depth (Feb/24)	Other	17.52	67.1779
Seawater sites	Sample_34	200m from cage - 1m depth (Feb/24)	"Candidatus Pelagibacter"	5.42	20.7822
Seawater sites	Sample_34	200m from cage - 1m depth (Feb/24)	"Candidatus Pseudothioglobus"	1.51	5.78988
Seawater sites	Sample_34	200m from cage - 1m depth (Feb/24)	Pseudomonas	0.88	3.37423
Seawater sites	Sample_34	200m from cage - 1m depth (Feb/24)	Polaribacter	0.75	2.87577
Seawater sites	Sample_35	200m from cage - 20m depth (Feb/24)	Other	18.36	67.8492
Seawater sites	Sample_35	200m from cage - 20m depth (Feb/24)	"Candidatus Pelagibacter"	5.6	20.6948
Seawater sites	Sample_35	200m from cage - 20m depth (Feb/24)	"Candidatus Pseudothioglobus"	1.49	5.50628
Seawater sites	Sample_35	200m from cage - 20m depth (Feb/24)	Flavobacterium	0.81	2.99335
Seawater sites	Sample_35	200m from cage - 20m depth (Feb/24)	Polaribacter	0.8	2.95639
Wellboat	Sample_26	Wellboat before treatment	Other	30.15	63.823
Wellboat	Sample_26	Wellboat before treatment	Flavobacterium	5.47	11.5792
Wellboat	Sample_26	Wellboat before treatment	Limnohabitans	4.82	10.2032
Wellboat	Sample_26	Wellboat before treatment	Gyeongsanvirus	3.7	7.83235
Wellboat	Sample_26	Wellboat before treatment	Pseudomonas	3.1	6.56224
Wellboat	Sample_27	Wellboat after treatment	Other	1.71	81.0427
Wellboat	Sample_27	Wellboat after treatment	Streptomyces	0.12	5.6872
Wellboat	Sample_27	Wellboat after treatment	Psychrobacillus	0.11	5.21327
Wellboat	Sample_27	Wellboat after treatment	Bacillus	0.09	4.2654
Wellboat	Sample_27	Wellboat after treatment	Flavobacterium	0.08	3.79147
Controls	Sample_(29)NegativeShield	Negative control	Other	17.4	59.938
Controls	Sample_(29)NegativeShield	Negative control	"Candidatus Pelagibacter"	5.81	20.0138
Controls	Sample_(29)NegativeShield	Negative control	Shewanella	2.33	8.02618
Controls	Sample_(29)NegativeShield	Negative control	Flavobacterium	2.33	8.02618
Controls	Sample_(29)NegativeShield	Negative control	Bartonella	1.16	3.99587
Controls	Sample_T04	Pilot exp. control	Yersinia	96.95	99.9897
Controls	Sample_T04	Pilot exp. control	Streptomyces	0.01	0.0103135
Controls	Sample_T04	Pilot exp. control	Serratia	0	0
Controls	Sample_T04	Pilot exp. control	Escherichia	0	0
Controls	Sample_T04	Pilot exp. control	Other	0	0
Controls	Sample_ZymoStandard	Positive control	Other	36.27	38.2595
Controls	Sample_ZymoStandard	Positive control	Staphylococcus	16.84	17.7637
Controls	Sample_ZymoStandard	Positive control	Bacillus	15.98	16.8565
Controls	Sample_ZymoStandard	Positive control	Listeria	13.9	14.6624
Controls	Sample_ZymoStandard	Positive control	Enterococcus	11.81	12.4578
