# Supplementary material for: Integrated approaches for pathogen monitoring and shotgun metagenomic analysis in Atlantic salmon farming
Source: Research Square preprint supplement (doi:10.21203/rs.3.rs-8373998/v1), 2026-02-19
Supplement: Supplementary file 4 [file 8685ed482c3d3136459f7a07.xlsx]

## Sheet: gBlock
gBlock name	SAV_Yr_PRV_SGPV_ISAV
gBlock Conc. (ng/µl)	8.408
Molecular weight (fmol/ng)	2.36
							Suggested dilution of gBlock										Start	Needed	Wanted	Wanted
Estimated copy nr/µl	1.19494e+10	1.19494e+10						µL			µL						Concentration	Volume	Concentration	Volume
							gBlock undiluted	5.8	+	TE-Buffer	1994.2	=	Stock Solution				50000000	40	1000000	2000
							Stock Solution	40	+	MQ-H2O	1960	=	#1
							#1	200	+	MQ-H2O	600	=	#2
Start	Needed	Wanted	Wanted		Add		#2	200	+	MQ-H2O	600	=	#3
Concentration	Volume	Concentration	Volum		Water		….	200	+	MQ-H2O	600	=	…..
1.19494e+10	8.36863	50000000	2000		1991.63		#13	200	+	MQ-H2O	600	=	14
Expected DNA copies in	1µL	5µL
Stock Solution	50000000
#1	1000000	5000000
#2	250000	1250000
#3	62500	312500
#4	15625	78125
#5	3906.25	19531.2
#6	976.562	4882.81
#7	244.141	1220.7
#8	61.0352	305.176
#9	15.2588	76.2939
#10	3.8147	19.0735
#11	0.953674	4.76837
#12	0.238419	1.19209
#13	0.0596046	0.298023
#14	0.0149012	0.0745058

## Sheet: Results
ISAV		Cq Mean (n = 2)	Cq Std. Dev	SQ Mean = expected DNA copies in 5 µL	SQ Std. Dev.									PRV1		Cq Mean (n = 2)	Cq Std. Dev	SQ Mean = expected DNA copies in 5 µL	SQ Std. Dev.
For standard curve	gBlock Std^4_1:1	25.785	0.120208	78130	0									For standard curve	gBlock Std^4_1:1	23.775	0.0353553	78130	0
	gBlock Std^4_1:10	29.18	0.0848528	7813	0										gBlock Std^4_1:10	27.19	0.0565685	7813	0
	gBlock Std^4_1:100	32.305	0.374767	781.3	0										gBlock Std^4_1:100	30.79	0.240416	781.3	0
	gBlock Std^4_1:1000	35.745	0.883883	78.13	0										gBlock Std^4_1:1000	33.835	0.403051	78.13	0
								Conversion to copies/L:					Copy numbers measured in 5 µL of extract were converted to copies per litre of water using:
Sample	Description	Group	Cq Mean	Cq Std. Dev.	SQ Mean	SQ Std. Dev.		SQ Mean	SQ Std. Dev.				copies per L = copies in 5 µL x (100 µL elution volume/ 5 µL) x (1 L / 0.5 L filtration volume)
Sample_01	Outlet water (Feb/23)	Hatchery	35.39	0.367696	98.8	25.3144		3952	1012.58
Sample_02	Tank water (Feb/23)	Hatchery	35.415	0.0919239	95.605	6.35689		3824.2	254.276				5 µL used in the qPCR
Sample_03	Inlet water (Feb/23)	Hatchery	34.68	0.226274	160.35	25.2437		6414	1009.75				100 µL total elution volume after nucleic acid extraction
Sample_04	Control (Feb/23)	Hatchery	N/A	N/A	N/A	N/A		N/A	N/A				0.5 L (500 mL) water filtered
Sample_05	Outlet water (May/23)	Hatchery	34.295	0.0777817	209.25	11.1016		8370	444.063
Sample_06	Tank water (May/23)	Hatchery	34.25	0.296985	217.5	43.8406		8700	1753.62
Sample_07	Inlet water (May/23)	Hatchery	34.375	0.120208	197.1	16.5463		7884	661.852
Sample_08	Control (May/23)	Hatchery	N/A	N/A	N/A	N/A		N/A	N/A
Sample_09	1km from cage - 1m depth (Apr/23)	Seawater sites	N/A	N/A	N/A	N/A		N/A	N/A
Sample_10	1km from cage - 20m depth (Apr/23)	Seawater sites	N/A	N/A	N/A	N/A		N/A	N/A
Sample_11	Seawater cage (Apr/23)	Seawater sites	N/A	N/A	N/A	N/A		N/A	N/A
Sample_12	Control (Apr/23)	Seawater sites	N/A	N/A	N/A	N/A		N/A	N/A
Sample_13	1km from cage - 1m depth (May/23)	Seawater sites	N/A	N/A	N/A	N/A		N/A	N/A
Sample_14	1km from cage - 20m depth (May/23)	Seawater sites	N/A	N/A	N/A	N/A		N/A	N/A
Sample_15	Seawater cage (May/23)	Seawater sites	N/A	N/A	N/A	N/A		N/A	N/A
Sample_16	Control (May/23)	Seawater sites	N/A	N/A	N/A	N/A		N/A	N/A
Sample_17	Seawater cage (Jun/23)	Seawater sites	N/A	N/A	N/A	N/A		N/A	N/A
Sample_21	Seawater cage (Jul/23)	Seawater sites	N/A	N/A	N/A	N/A		N/A	N/A
Sample_18	Seawater cage (Aug/23)	Seawater sites	37.995	0.657609	5.2485	2.29456		209.94	91.7825
Sample_19	Control (Aug/23)	Seawater sites	N/A	N/A	N/A	N/A		N/A	N/A
Sample_20	Seawater cage (Sep/23)	Seawater sites	31.68	0.0565685	370.65	13.93		14826	557.2
Sample_22	1km from cage - 1m depth (Oct/23)	Seawater sites	N/A	N/A	N/A	N/A		N/A	N/A
Sample_23	1km from cage - 20m depth (Oct/23)	Seawater sites	N/A	N/A	N/A	N/A		N/A	N/A
Sample_24	Seawater cage (Oct/23)	Seawater sites	34.12	0.0848528	70.02	4.07294		2800.8	162.917
Sample_25	Control (Oct/23)	Seawater sites	N/A	N/A	N/A	N/A		N/A	N/A
Sample_26	Wellboat before treatment (Nov/23)	Wellboat	36.805	0.770746	12.0445	6.07475		481.78	242.99
Sample_27	Wellboat after treatment (Nov/23)	Wellboat	29.93	0.0707107	1219	57.9828		48760	2319.31
Sample_28	Seawater cage (Dec/23)	Seawater sites	32.145	0.0212132	269.25	3.3234		10770	132.936
Sample_30	1km from cage - 1m depth (Feb/24)	Seawater sites	N/A	N/A	N/A	N/A		N/A	N/A
Sample_31	1km from cage - 20m depth (Feb/24)	Seawater sites	N/A	N/A	N/A	N/A		N/A	N/A
Sample_32	Seawater cage (Feb/24)	Seawater sites	39.195	1.46371	2.7825	2.39214		111.3	95.6857
Sample_33	Control (Feb/24)	Seawater sites	N/A	N/A	N/A	N/A		N/A	N/A
Sample_34	200m from cage - 1m depth (Feb/24)	Seawater sites	40.09	0.0141421	1.195	0.0113137		47.8	0.452548
Sample_35	200m from cage - 20m depth (Feb/24)	Seawater sites	N/A	N/A	N/A	N/A		N/A	N/A
