# Supplementary material for: Integrated approaches for pathogen monitoring and shotgun metagenomic analysis in Atlantic salmon farming
Source: Research Square preprint supplement (doi:10.21203/rs.3.rs-8373998/v1), 2026-02-19
Supplement: Supplementary file 6 [file c1aef19a099d52e2971f9db5.xlsx]

## Sheet: Unclassified_and_Other_Genus
Group	Sample	Sample_display	Total_rank (%)	Other (%)	Unclassified (%)
Hatchery	Sample_01	Outlet water (Feb/23)	49.38	27.25	18.31
Hatchery	Sample_02	Tank water (Feb/23)	50.77	27.07	16.9
Hatchery	Sample_03	Inlet water (Feb/23)	48.68	29.61	20.27
Hatchery	Sample_05	Outlet water (May/23)	44.26	17.57	6.83
Hatchery	Sample_06	Tank water (May/23)	44.05	15.02	5.94
Hatchery	Sample_07	Inlet water (May/23)	45.67	15.95	8.64
Seawater sites	Sample_09	1km from cage - 1m depth (Apr/23)	25.11	16.26	18.75
Seawater sites	Sample_10	1km from cage - 20m depth (Apr/23)	21.95	14.9	22.59
Seawater sites	Sample_11	Seawater cage (Apr/23)	25.17	16.37	22.22
Seawater sites	Sample_13	1km from cage - 1m depth (May/23)	21.75	14.31	21.51
Seawater sites	Sample_14	1km from cage - 20m depth (May/23)	25.33	16.9	22.63
Seawater sites	Sample_15	Seawater cage (May/23)	29.28	20.06	19.05
Seawater sites	Sample_17	Seawater cage (Jun/23)	25.98	13.08	24.99
Seawater sites	Sample_21	Seawater cage (Jul/23)	26.53	16.92	22.69
Seawater sites	Sample_18	Seawater cage (Aug/23)	23.55	14.43	28.46
Seawater sites	Sample_20	Seawater cage (Sep/23)	12.29	8.74	32.13
Seawater sites	Sample_22	1km from cage - 1m depth (Oct/23)	25.36	16.92	20.63
Seawater sites	Sample_23	1km from cage - 20m depth (Oct/23)	27.07	18.31	19.15
Seawater sites	Sample_24	Seawater cage (Oct/23)	41.38	26.25	14.89
Seawater sites	Sample_28	Seawater cage (Dec/23)	21.6	15.44	31.45
Seawater sites	Sample_30	1km from cage - 1m depth (Feb/24)	22.09	14.34	28.79
Seawater sites	Sample_31	1km from cage - 20m depth (Feb/24)	22.11	14.31	30.17
Seawater sites	Sample_32	Seawater cage (Feb/24)	23.85	15.08	27.02
Seawater sites	Sample_34	200m from cage - 1m depth (Feb/24)	26.08	17.52	25.03
Seawater sites	Sample_35	200m from cage - 20m depth (Feb/24)	27.06	18.36	23.69
Wellboat	Sample_26	Wellboat before treatment	47.24	30.15	27.64
Wellboat	Sample_27	Wellboat after treatment	2.11	1.71	43.5
Controls	Sample_(29)NegativeShield	Negative control	29.03	17.4	22.09
Controls	Sample_T04	Pilot exp. control	96.96	0	1.53
Controls	Sample_ZymoStandard	Positive control	94.8	36.27	0.01
